# Supplementary material for: Tumors Provoke Inflammation and Perineural Microlesions at Adjacent Peripheral Nerves
Source: PubMed Central journal article supplement (PMC7072456; doi:10.3390/cells9020320), 2020-01-29
Supplement: cells-09-00320-s001.pdf [file cells-09-00320-s001.pdf]

## Table S1:

**Table S1:** Antibodies used in MELC analyses.

| Target       | Company          | Clone or order number |
|--------------|------------------|-----------------------|
| CD4          | Southern Biotech | L3T4                  |
| CD8          | BD Pharmingen    | 53-6.7                |
| CD11b        | BioRad           | M1/70.15              |
| CD11c        | Miltenyi Biotec  | N418                  |
| CD22         | Miltenyi Biotec  | 130-102-576           |
| CD31         | BD Biosciences   | MEC13.3               |
| CD45         | Miltenyi Biotec  | 30F11.1               |
| CD86         | Biolegend        | GL-1                  |
| CD206        | AbD Serotec      | MCA22335FA            |
| Ki67         | eBioscience      | So1A15                |
| Ly6G         | eBioscience      | RB6-8C5               |
| MHC II       | Miltenyi Biotec  | 120-000-810           |
| Siglec F     | BD Pharmingen    | E50-2440              |
| TNF $\alpha$ | Miltenyi Biotec  | 130-109-720           |

## Table S2:

**Table S2:** Internal standards and their concentration in the working solution for the LC-QTOFMS analysis.

| Analyte              | Concentration (ng/mL) |
|----------------------|-----------------------|
| Arachidonic acid-d8  | 8.33                  |
| CE 18:1-d7           | 4650                  |
| Cer d18:1/16:0-d7    | 6.67                  |
| Cholesterol-d7       | 1330                  |
| DG 15:0/18:1-d7      | 157                   |
| LacCer d18:1/17:0    | 53.3                  |
| LPC 18:1-d7          | 317                   |
| LPC O-16:0-d4        | 16.7                  |
| LPE 18:1-d7          | 6.67                  |
| LPG 17:1             | 31.7                  |
| LPI 17:1             | 14.2                  |
| PC 15:0/18:1-d7      | 2110                  |
| PC O-18:0/18:1-d9    | 104                   |
| PE 15:0/18:1-d7      | 66.7                  |
| PE O-18:0/18:1-d9    | 0.933                 |
| PG 15:0/18:1-d7      | 63.3                  |
| PI 15:0/18:1-d7      | 113                   |
| PS 15:0/18:1-d7      | 261                   |
| SM d18:1/18:1-d9     | 393                   |
| TG 15:0/18:1-d7/15:0 | 759                   |

## Table S3:

**Table S3:** Scoring of the general health status at the latest recorded day.

| Read out             | E0771 d14 | B16-F10 d10 | MC57 d19 |
|----------------------|-----------|-------------|----------|
| dehydrated           | 0         | 0           | 0        |
| posture: bended      | 0         | 0           | 0        |
| hunched              | 0         | 0           | 0        |
| movements: reduced   | 0         | 0           | 0        |
| paralysis            | 0         | 0           | 0        |
| cramps               | 0         | 0           | 0        |
| fur: piloerection    | 0         | 0           | 0        |
| dirty                | 0         | 0           | 0        |
| body openings:       |           |             |          |
| diarrhea             | 0         | 0           | 0        |
| handling: aggressive | 0         | 0           | 0        |
| apathic              | 0         | 0           | 0        |
| anxious              | 0         | 0           | 0        |
| Others: skin rash    | 0         | 0           | 0        |
| skin inflammation    | 0         | 0           | 0        |
| injury               | 0         | 0           | 0        |

Scoring of the general health status was performed at a daily basis (n=16).  
Score 0 depicts no change in comparison pretreatment conditions.

**Figure S1:**

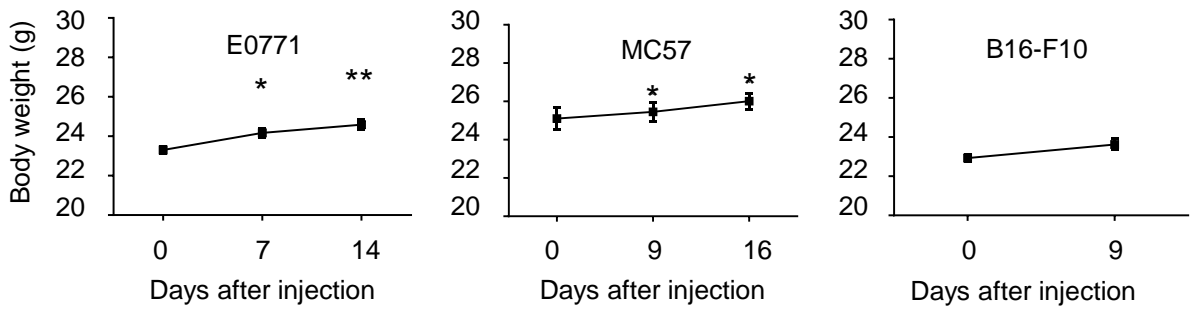

**Figure S1:** Body weight (g) of mice before and after tumor cell injection. Data are shown as mean  $\pm$  S.E.M. (n=13). One-way ANOVA/Tukey's multiple comparison \*  $p < 0.05$ ; \*\*  $p < 0.01$

**Figure S2:**

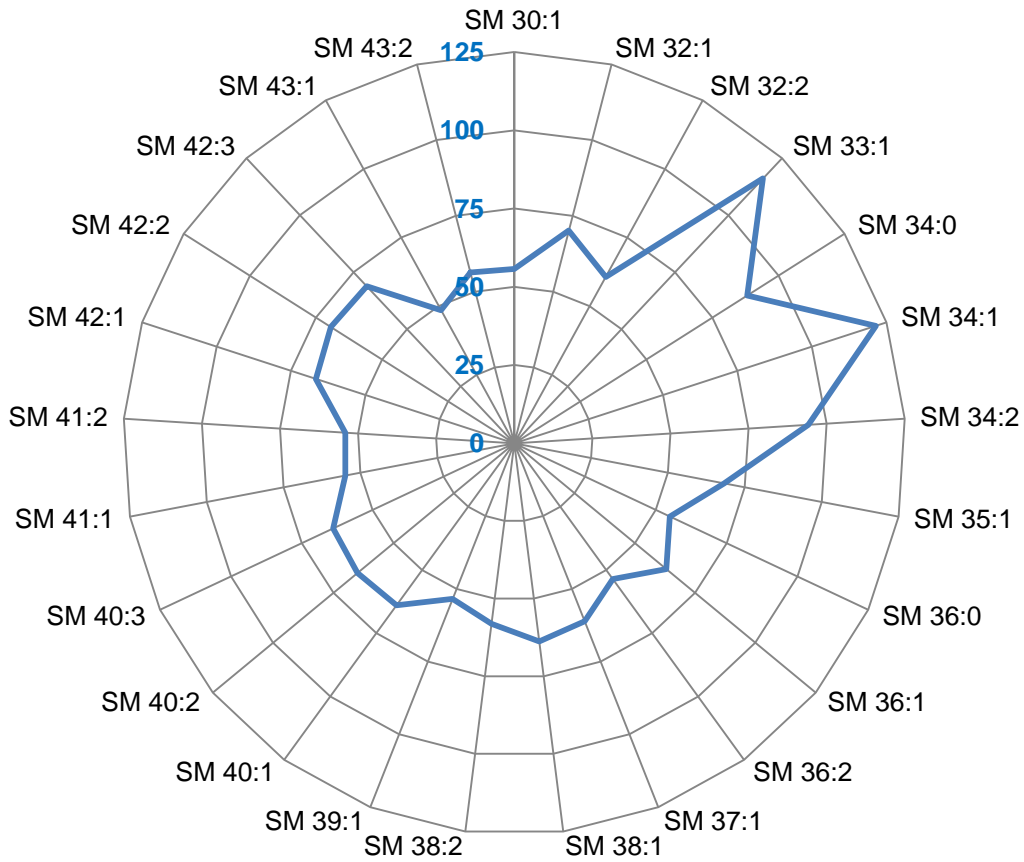

**Figure S2:** Tumor-induced downregulation of sphingomyelins in sciatic nerves. Lipidomic comparison of ipsi- and contralateral sciatic nerves 14 days after E0771 tumor cell injection. Shown are sphingomyelin concentrations. Data are mean (n=5) and are presented as level in the ipsilateral nerve in percent of the contralateral nerve (set as 100%).

**Figure S3:**

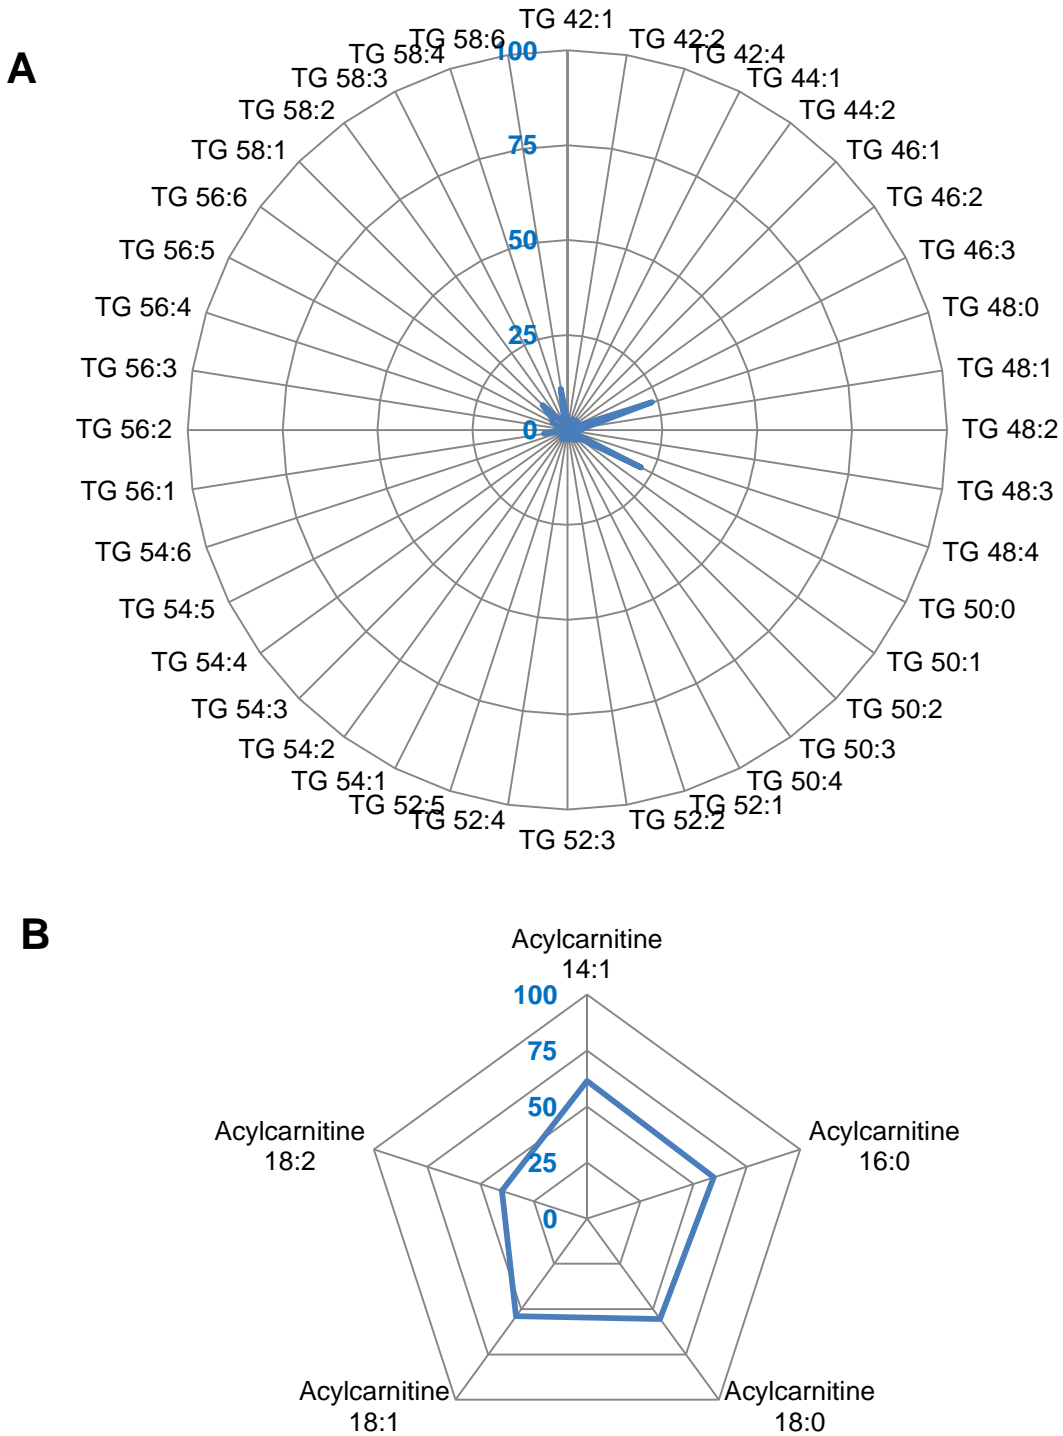

**Figure S3:** Tumor-induced downregulation of triglycerides and acylcarnitines in sciatic nerves. **(A,B)** Lipidomic comparison of ipsi- and contralateral sciatic nerves 14 days after E0771 tumor cell injection. Shown are triglycerides (panel A) and acylcarnitines (panel B). Data are mean (n=5) and are presented as level in the ipsilateral nerve in percent of the contralateral nerve (set as 100%).

**Figure S4:**

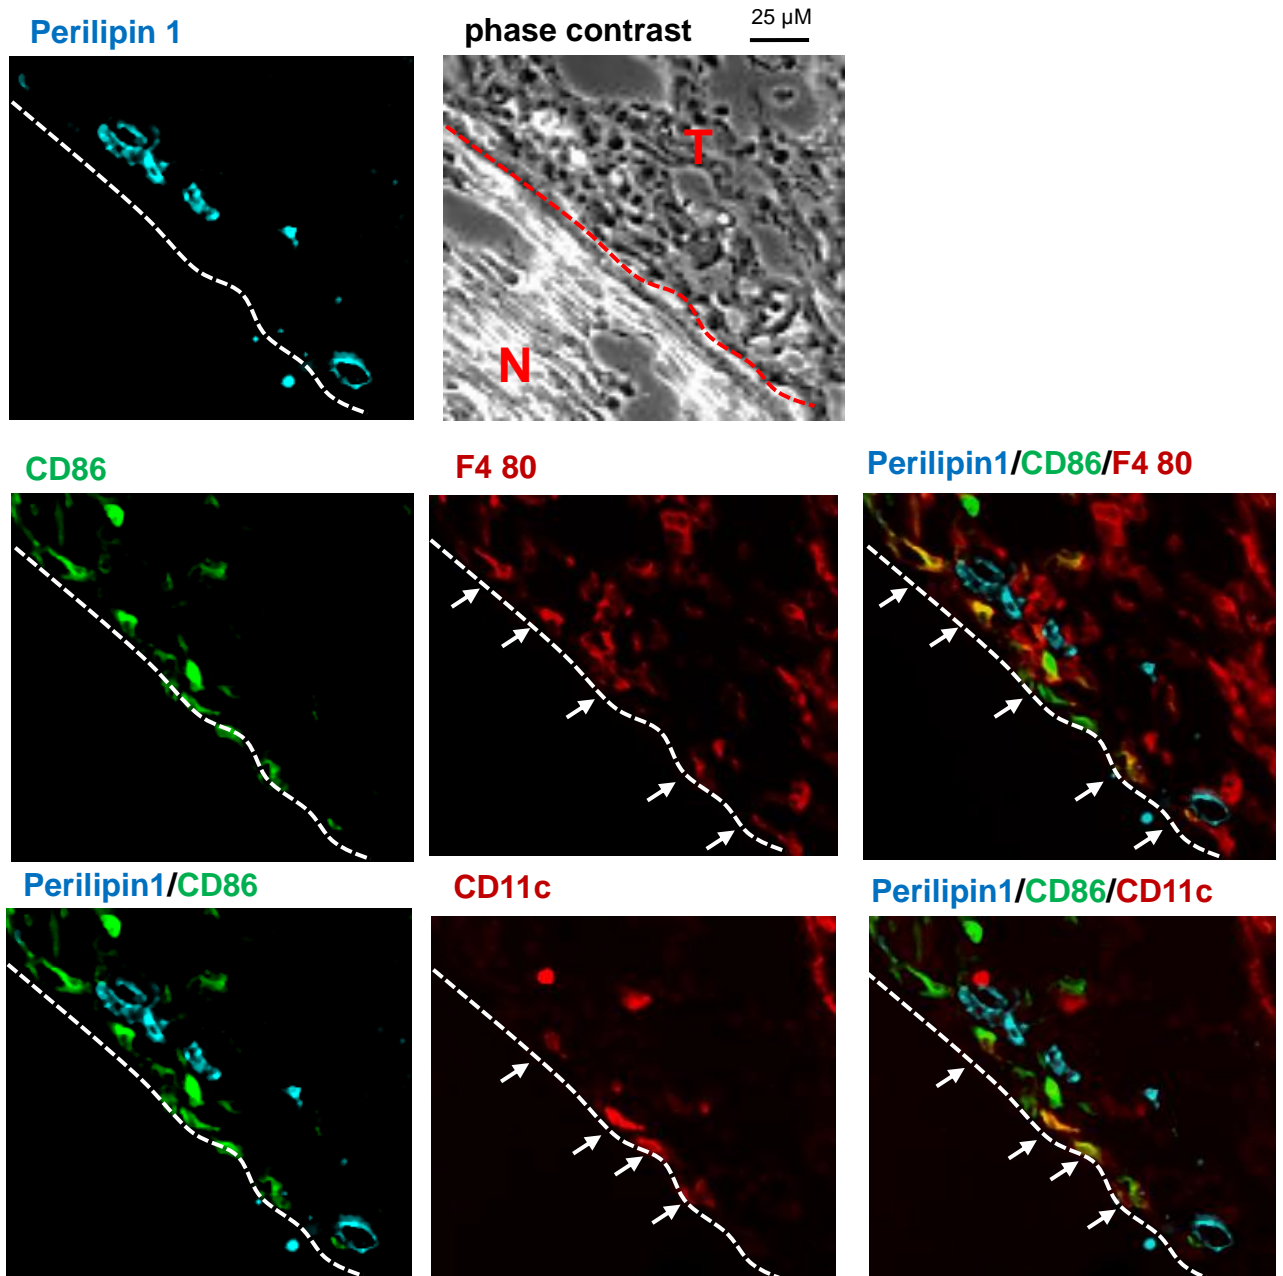

**Figure S4:** Proinflammatory macrophages (CD86+/F4 80+) and dendritic cells (CD86+/CD11c+) are in direct vicinity of epineural adipocytes. MELC staining of sciatic nerves from mice 14 days after injection with E0771 tumor cells. The white dotted lines depict the outer layer of the sciatic nerve. T, tumor tissue; N, sciatic nerve.

**Figure S5:**

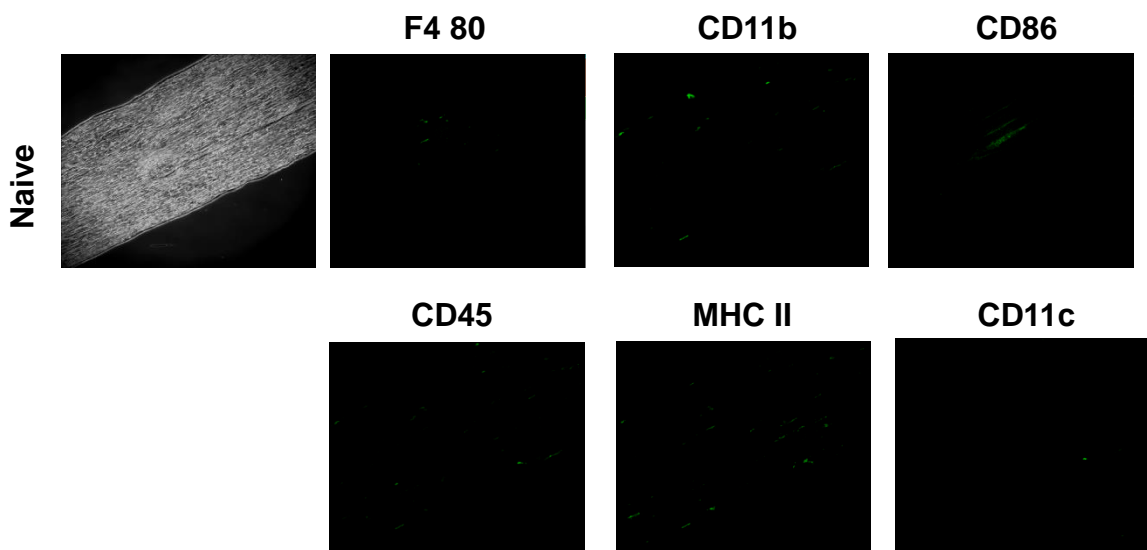

**Figure S5:** Macrophages or dendritic cells are not observed in sciatic nerves from naïve mice. MELC staining of sciatic nerves from naïve mice show no immune cells within or attached to the sciatic nerve.



**Figure S6:**

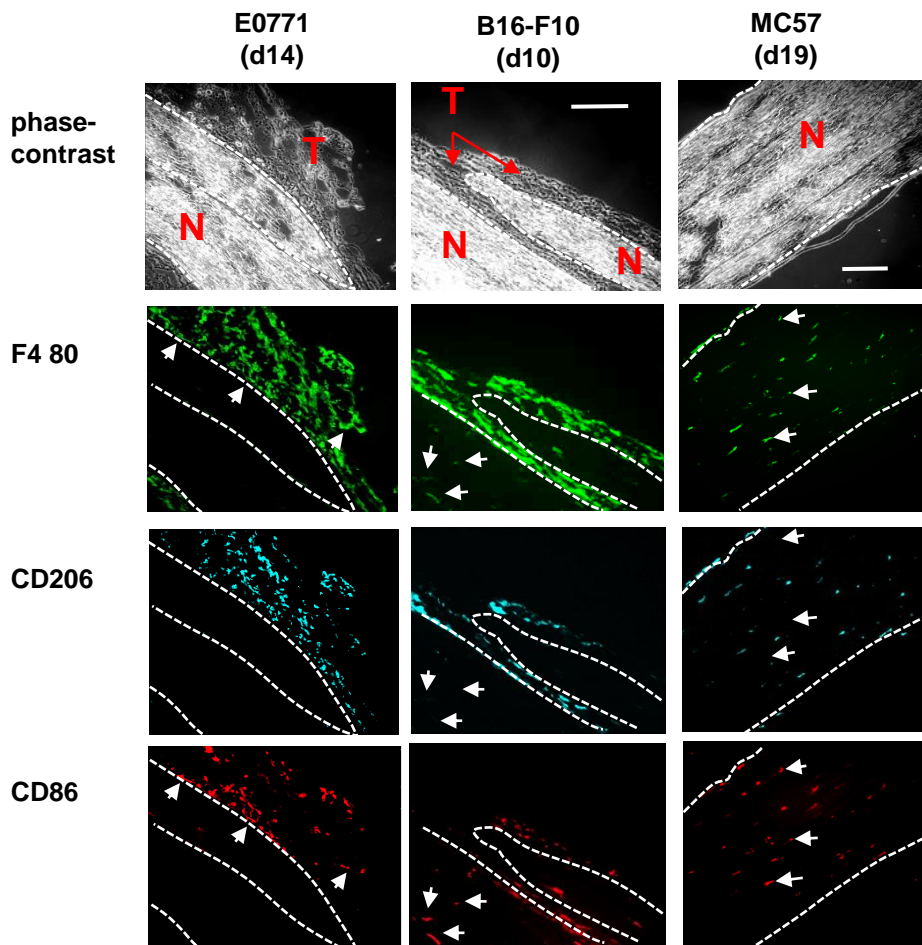

**Figure S6:** Macrophage polarization in tumors (T) and sciatic nerves (N). MELC staining of sciatic nerves from mice after injection with E0771 (d14), B16-F10 (d10) or MC57 (d19) tumor cells (for E0771 see also Figure S4). Shown are stainings for F4 80 (macrophages), CD206 (M2 polarization) and CD86 (M1 polarization). MC57 tumors are not in contact with the sciatic nerve and are therefore not included in the images. White arrows depict examples for CD86-expressing macrophages inside the sciatic nerve. White dotted line depict the outlines of the sciatic nerves. White bars = 100  $\mu\text{m}$ .
